# Supplementary material
Source: Springer Nature journal article supplement (https://www.springermedizin.de/resource/supplementary/12984_2009_200_MOESM3_ESM.pdf/9605516)

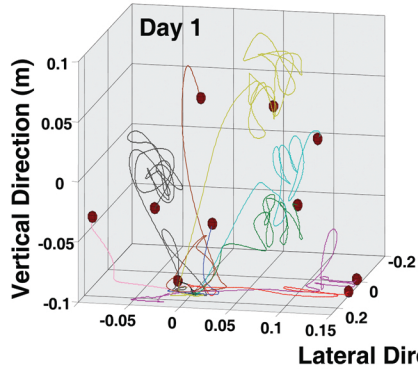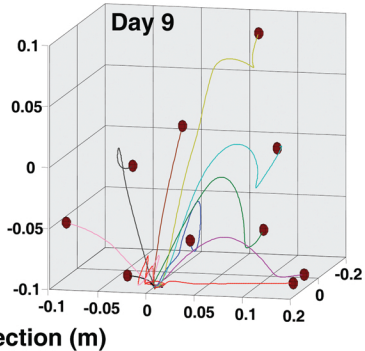

Supplement: MOESM3 [file 9605516]
